# Supplementary material for: Integrity of zinc finger motifs in PML protein is necessary for inducing its degradation by antimony
Source: Royal Society of Chemistry journal article supplement (doi:10.1039/c9mt00102f), 2019-07-05

## Supplementary Data

### **Integrity of Zinc Finger Motifs in PML protein is Necessary for Inducing its Protein Degradation by Antimony**

Chang Yang<sup>1,3\*</sup>, Rui Hao<sup>1,5\*</sup>, Yong Fei Lan<sup>2</sup>, Ye Jia Chen<sup>3</sup>, Chao Wang<sup>3</sup>, Na Bu<sup>4</sup>,  
Qian Qian Wang<sup>2,3</sup>, Liaqat Hussain<sup>1,3</sup>, Li Ya Ma<sup>6</sup>,  
Yasen Maimaitiyiming<sup>1,3</sup>, Xiao Yang Lu<sup>7</sup>, Hua Naranmandura<sup>1-3,5,6†</sup>

<sup>1</sup>Department of Pharmacology, School of Medicine, Zhejiang University; <sup>2</sup>College of Pharmaceutical Sciences, Zhejiang University; <sup>3</sup>Department of Toxicology, School of Medicine and Public Health, Zhejiang University; <sup>4</sup>Department of Pharmacy, Women's Hospital, School of Medicine, Zhejiang University; <sup>5</sup>College of Pharmaceutical Sciences, Inner Mongolia Medical University, Hohhot, China

<sup>6</sup>Department of Hematology, the First Affiliated Hospital, Zhejiang University;

<sup>7</sup>Department of Pharmacy, the First Affiliated Hospital, Zhejiang University

## **Materials and Methods**

### *Reagents*

All reagents were of analytical grade. Milli-Q water (Millipore) was used throughout the experiment. Trizma<sup>®</sup> HCl and Trizma<sup>®</sup> Base, phenazene methosulfate, decylubiquinone, 3-(4,5-dimethylthiazol-2-yl)-2,5-diphenyl tetrazolium bromide (MTT), and dimethyl sulfoxide (DMSO) were purchased from Sigma (St. Louis, MO, USA). Phenylstibine oxide (PSO), phenanthroline monohydrate (PTMH), sodium arsenite (iAs<sup>III</sup>), were purchased from Wako Pure Chemical Industries, Ltd.(Osaka, Japan). Trivalent antimony was obtained from Tri Chemicals (Yamanashi, Japan).

### *Antibodies*

Primary antibodies RAR $\alpha$ , PRAM-1, rabbit anti-Poly (ADP-ribose) polymerase (PARP) polyclonal antibody, rabbit anti-human PML, anti-human SUMO-1, Ub antibody were purchased from Santa Cruz Biotechnology (CA, USA). Primary antibodies;  $\beta$ -actin, anti-cleaved caspase-3 antibody, caspase-3, GAPDH were purchased from Cell Signaling Technology (Danvers, MA). Anti-FLAG mouse monoclonal antibody was purchased from Sigma.

### *Ultra-sonication for Increasing the Cell Permeability of EDTA*

PMLV transfected HEK293T cells were seeded on T25 cell culture flask and exposure to 500 $\mu$ M EDTA and then sonicated at different voltage on ice for different time (2-3min), and then exposed to 8 $\mu$ M of iAs<sup>III</sup> at 37°C for 3h. Proteins were extracted with RIPA buffer. PML V protein solubility changes and degradation were determined by western-blot.

### *UV absorption spectroscopy*

Phenanthroline dissolved in the spectroscopic grade methanol was mixed with trivalent antimony water solution at different ratio. The UV spectra of the mixture were recorded in the wavelength range 230–500 nm with a UV–vis spectrophotometer (Shimadzu, Japan).

## Figure Legends

### **Fig.S1. Proposed Metabolism Pathway of Arsenic (iAs<sup>III</sup>) and Antimony (Sb<sup>III</sup>) *in vivo***

Proposed methylation reaction and its intermediate metabolites of arsenic (**A**) and antimony (**B**) *in vivo*. In particular, Sb<sup>III</sup> was found to be unable to methylate to more toxic mono- and dimethylated antimony compounds in animal, which is different from arsenic.

### **Fig.S2. Establishment of EDTA in preventing of PML protein solubility changes induced by arsenic trioxide**

PML over-expressed HEK293T cells were sonicated by ultrasonicator for 5mins in presence of EDTA (500μM), and then exposed to iAs<sup>III</sup> at 8μM for 3h (**A**). PML over-expressed HEK293T cells were sonicated by ultrasonicator at different conditions (voltage, power 1.5%; power 2.15%) in presence of EDTA, and then treated with iAs<sup>III</sup> for 3h (**B**). PML protein solubility changes as well as degradations in soluble and insoluble pellet fractions were determined by western blot. Asterisks indicate unspecific bands.

### **Fig.S3. UV spectra of Phenanthroline mixed with Sb<sup>III</sup> at different ratio.**

Phenanthroline(100μM) was mixed with Sb<sup>III</sup> at different ratio (1:1, 1:10, 1:50). The UV absorption spectrum of the mixture was detected by UV–vis spectrophotometer in the wavelength range 230–500 nm.

### **Fig.S4. Effect of Phenylstibine Oxide (PSO) on Mutant PML Proteins Solubility Change and Modifications**

Flag-PMLV (C212A) and (L218P) overexpressed HEK293T cells were exposed to PSO at indicated concentrations for 6h. Then, PMLV (C212A) (**A**) and (L218P) (**B**) protein solubility changes as well as degradations in soluble and insoluble pellet fractions were determined by western blot. Asterisks indicate unspecific bands.

**Fig.S1**

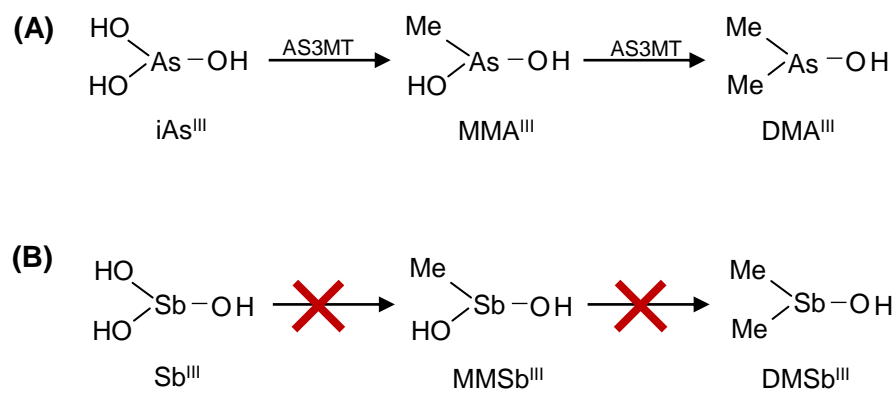

**Fig.S2**

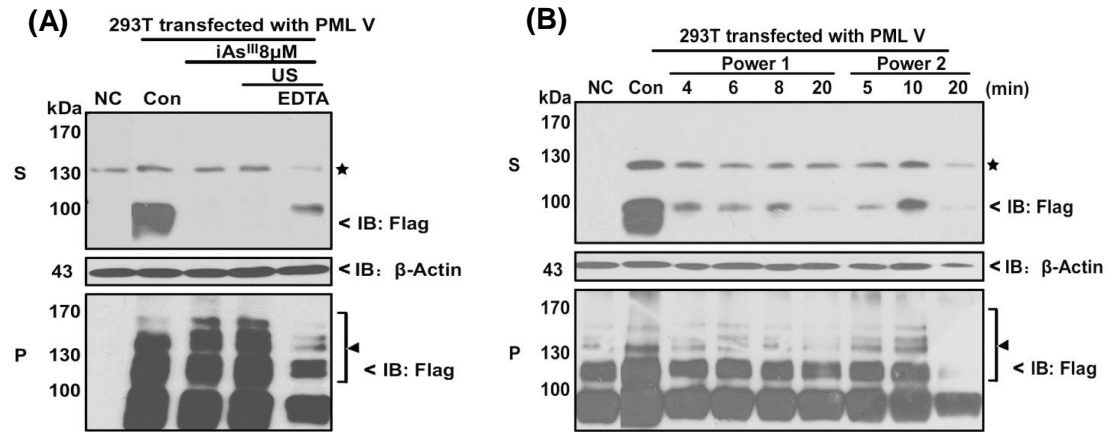

**Fig.S3**

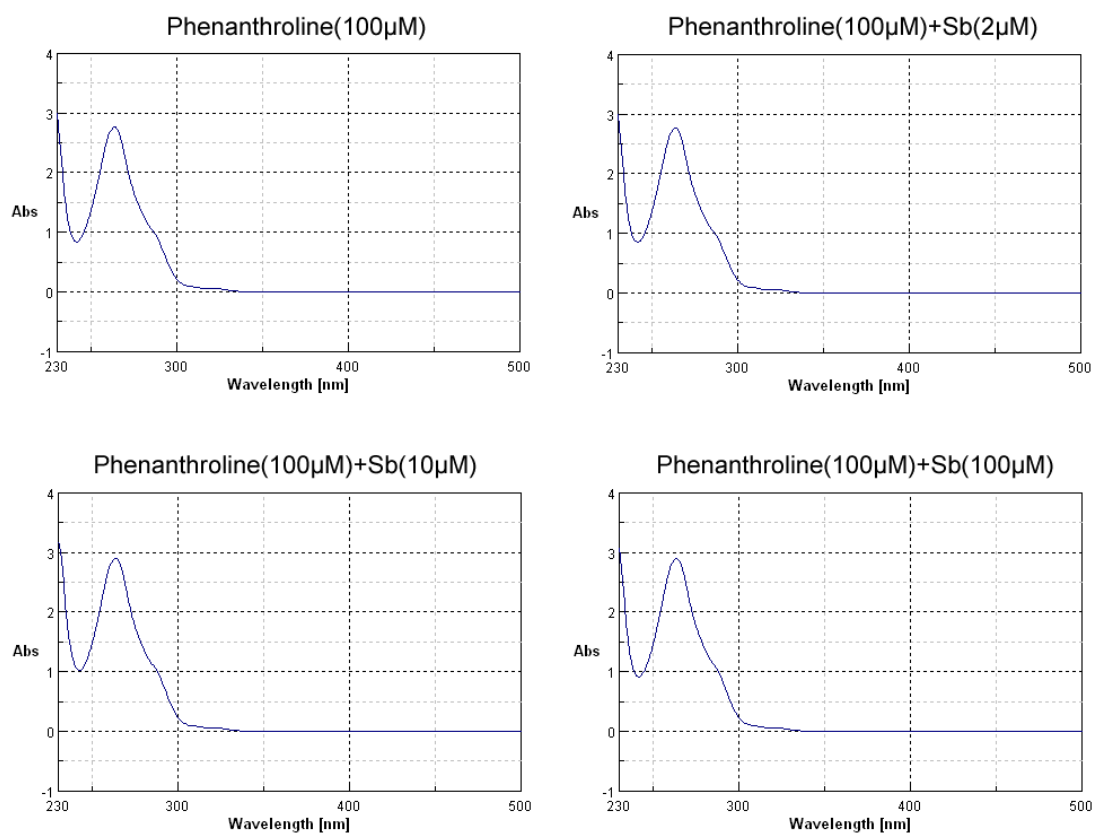

**Fig.S4**

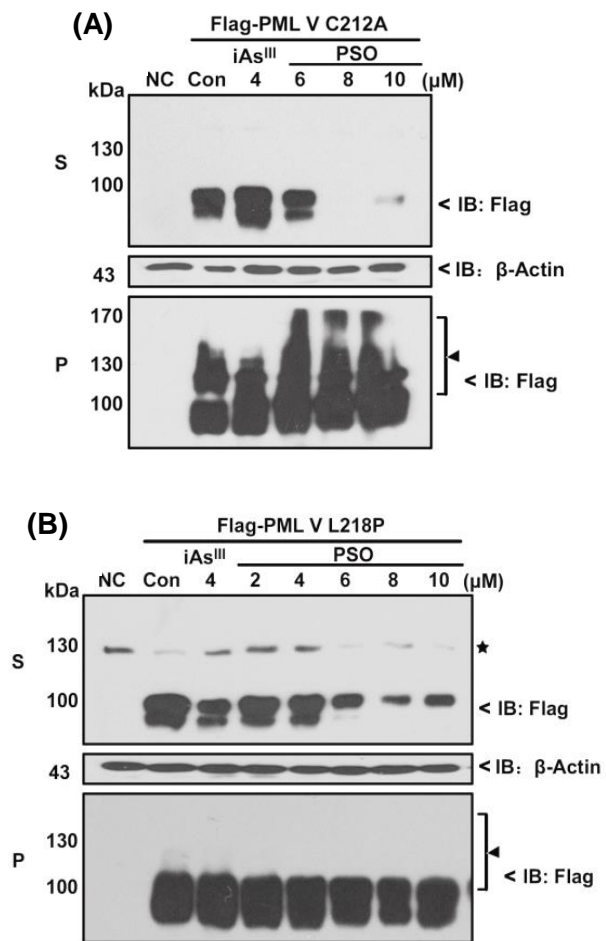

Supplement: c9mt00102f1.pdf [file c9mt00102f1.pdf]
